# Supplementary material for: Roles of miR-20a-5p in breast cancer based on the clinical and multi-omic (CAMO) cohort and in vitro studies
Source: PubMed Central journal article supplement (PMC11499649; doi:10.1038/s41598-024-75557-0), 2024-10-23
Supplement: 41598_2024_75557_MOESM1_ESM.pdf [file 41598_2024_75557_MOESM1_ESM.pdf]

## List of abbreviations

|       |                                                              |
|-------|--------------------------------------------------------------|
| BMI   | Body mass index                                              |
| CAF   | Cancer associated fibroblast                                 |
| CAMO  | Clinical and Multi-omics cohort                              |
| CI    | Confidence interval                                          |
| DIG   | Digoxigenin                                                  |
| ER    | Estrogen receptor                                            |
| FBS   | Fetal bovine serum                                           |
| FFPE  | Formalin-fixed paraffin-embedded                             |
| HER2  | Human epidermal growth factor receptor 2                     |
| HR    | Hormone receptor                                             |
| ISH   | <i>In situ</i> hybridization                                 |
| MiRNA | MicroRNA                                                     |
| MTT   | 3-(4,5-dimethylthiazol-2-yl)-2,5-diphenyltetrazolium bromide |
| NcRNA | Non-coding RNA                                               |
| NOWAC | Norwegian Women and Cancer study                             |
| OR    | Odds ratio                                                   |
| PBS   | Phosphate buffered saline                                    |
| PR    | Progesterone receptor                                        |
| qPCR  | Quantitative polymerase chain reaction                       |
| REK   | Regional Ethical Committee                                   |
| TMA   | Tissue microarray                                            |
| TNBC  | Triple negative breast cancer                                |

## Supplementary Table S1 Probes and reagents used in ISH

| Probes and Reagents                               | Reference          | Company        |
|---------------------------------------------------|--------------------|----------------|
| Hsa-miR-20a-5p. miRURY LNA detection probe        | 6110011-360        | Exiqon         |
| Scramble-miR. miRURY LNA detection control probe  | 99004-15           | Exiqon         |
| U6, hsammurno. miRURY LNA detection control probe | 99002-15           | Exiqon         |
| microRNA ISH Bufferset (FFPE)                     | 9000               | Exiqon         |
| RiboWash SSPE buffer RUO                          | 5266262001         | Roche          |
| Discovery EZ Prep                                 | 5279755001         | Roche          |
| LCS (Liquid cover slip)                           | 5264839001         | Roche          |
| Reaction buffer (10x)                             | 5353955001         | Roche          |
| Discovery CC1 RUO                                 | 6414575001         | Roche          |
| Discovery Antibody block RUO                      | 5268869001         | Roche          |
| Anti DIG AP Multimer                              | 7256302001         | Roche          |
| ChromoMap Blue kit RUO                            | 526661001          | Roche          |
| Red Stain II                                      | 5272017001         | Roche          |
| Ethanol 96%                                       | 20823.362          | VWR, Avantor   |
| Etnanol absolute                                  | 20821.296          | VWR, Avantor   |
| Xylene                                            | 28975.291          | VWR, Avantor   |
| Histokitt mounting medium                         | Assistant 1025/250 | Sondheim/Rhoen |

## Supplementary Table S2 ISH protocol

|                                                                       | MiR-20a-5p                                       | U6                                               | Scramble miRNA                                   |
|-----------------------------------------------------------------------|--------------------------------------------------|--------------------------------------------------|--------------------------------------------------|
| <b>Deparaffinization</b>                                              | EZ Prep, 3x12 min, 68°C                          | EZ Prep, 3x12 min, 68°C                          | EZ Prep, 3x12 min, 68°C                          |
| <b>Heat retrieval</b>                                                 | Discovery CC1, 40 min, 95 °C                     | Discovery CC1, 40 min, 95 °C                     | Discovery CC1, 40 min, 95 °C                     |
| <b>Denaturation</b>                                                   | 8 min, 90 °C                                     | 8 min, 90 °C                                     | 8 min, 90 °C                                     |
| <b>Hybridization</b><br>Concentration<br>Buffer                       | 60 min, 40°C<br>50nM<br>microRNA ISH Bufferset   | 60 min, 55 °C<br>0.5nM<br>microRNA ISH Bufferset | 60 min, 57 °C<br>10nM<br>microRNA ISH Bufferset  |
| <b>Stringency wash</b>                                                | RiboWash, 2x8 min, 40°C                          | RiboWash, 2x8 min, 55°C                          | RiboWash, 2x8 min, 57°C                          |
| <b>Blocking</b>                                                       | AB block, 16 min, 37°C                           | AB block, 16 min, 37°C                           | AB block, 16 min, 37°C                           |
| <b>Secondary multimer</b>                                             | Anti-DIG-AP, 20 min, 37°C                        | Anti-DIG-AP, 20 min, 37°C                        | Anti-DIG-AP, 20 min, 37°C                        |
| <b>Detection</b>                                                      | Blue kit, 120 min, 37°C                          | Blue kit, 120 min, 37°C                          | Blue kit, 120 min, 37°C                          |
| <b>Counter stain</b>                                                  | Red II, 4 min, 37°C                              | Red II, 4 min, 37°C                              | Red II, 4 min, 37°C                              |
| <b>Used in multiple steps</b><br>Coverslip solution<br>Washing buffer | LCS (Liquid cover slip)<br>Reaction buffer (10x) | LCS (Liquid cover slip)<br>Reaction buffer (10x) | LCS (Liquid cover slip)<br>Reaction buffer (10x) |

# Supplementary figure S1 Proliferation

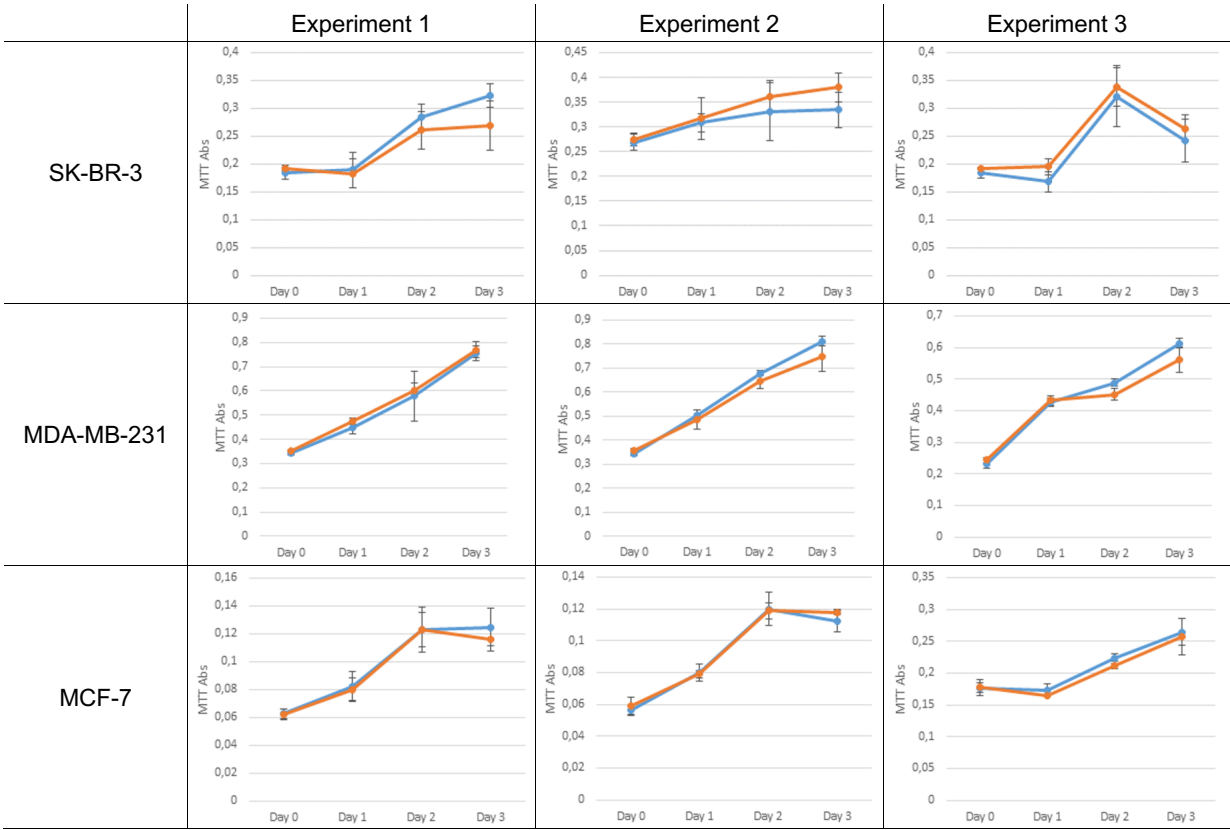

MTT assay to assess the effects of miR-20a-5p transfection on cell proliferation in the breast cancer cell lines SK-BR-3, MDA-MB-231, and MCF-7. Blue lines: cells transfected with miR-20a-5p mimic. Orange lines: negative control.
